# Supplementary material
Source: PubMed Central journal article supplement (PMC7274990)
Supplement: mmc1.pdf [file mmc1.pdf]

# THE LANCET

## Gastroenterology & Hepatology

### Supplementary appendix

This appendix formed part of the original submission and has been peer reviewed. We post it as supplied by the authors.

Supplement to: Barry A, Apisarnthanarax S, O’Kane GM, et al. Management of primary hepatic malignancies during the COVID-19 pandemic: recommendations for risk mitigation from a multidisciplinary perspective. *Lancet Gastroenterol Hepatol* 2020; published online June 5. [https://doi.org/10.1016/S2468-1253\(20\)30182-5](https://doi.org/10.1016/S2468-1253(20)30182-5).

Supplemental Table 1. Suggested COVID -19 Resources for Intra-Hepatic Malignancies (Accessed April 30<sup>th</sup> 2020)

|             |                                                                                                                                                                                                                                                                                                                                                                                                                                                         |
|-------------|---------------------------------------------------------------------------------------------------------------------------------------------------------------------------------------------------------------------------------------------------------------------------------------------------------------------------------------------------------------------------------------------------------------------------------------------------------|
| EASL        | EASL-ESCMID Position Paper: Patients with advanced liver disease and transplant recipients require specific care during COVID-19.<br><a href="https://easl.eu/news/easl-escmid-position-paper-on-covid19-and-the-liver/">https://easl.eu/news/easl-escmid-position-paper-on-covid19-and-the-liver/</a>                                                                                                                                                  |
| AASLD       | Covid-19 Resources<br><a href="https://www.aasld.org/about-aasld/covid-19-resources">https://www.aasld.org/about-aasld/covid-19-resources</a>                                                                                                                                                                                                                                                                                                           |
| ILCA        | Covid-19 and Liver Cancer<br><a href="https://ilca-online.org/covid19andlivercancer">https://ilca-online.org/covid19andlivercancer</a>                                                                                                                                                                                                                                                                                                                  |
| CASL        | COVID-19 Resources<br><a href="https://hepatology.ca/partners/covid-19-resources/">https://hepatology.ca/partners/covid-19-resources/</a>                                                                                                                                                                                                                                                                                                               |
| ESMO        | Management and treatment adapted recommendations in the COVID-19 era: hepatocellular carcinoma (HCC)<br><a href="https://www.esmo.org/guidelines/cancer-patient-management-during-the-covid-19-pandemic/gastrointestinal-cancers-hepatocellular-carcinoma-hcc-in-the-covid-19-era">https://www.esmo.org/guidelines/cancer-patient-management-during-the-covid-19-pandemic/gastrointestinal-cancers-hepatocellular-carcinoma-hcc-in-the-covid-19-era</a> |
| ASCO        | Covid-19 Provider and Practice Information<br><a href="https://www.asco.org/asco-coronavirus-information/provider-practice-preparedness-covid-19">https://www.asco.org/asco-coronavirus-information/provider-practice-preparedness-covid-19</a> .                                                                                                                                                                                                       |
| ASTRO       | Covid-19 Recommendations and Information<br><a href="https://www.astro.org/Daily-Practice/COVID-19-Recommendations-and-Information/Summary">https://www.astro.org/Daily-Practice/COVID-19-Recommendations-and-Information/Summary</a>                                                                                                                                                                                                                   |
| NICE UK     | Covid-19 Rapid Guideline: Delivery of Systemic Anti-Cancer Treatments.<br><a href="https://www.nice.org.uk/guidance/ng161">https://www.nice.org.uk/guidance/ng161</a>                                                                                                                                                                                                                                                                                   |
| BSG and JAG | Endoscopy Activity and Covid-19: BSG and JAG guidance.<br><a href="https://www.bsg.org.uk/covid-19-advice/endoscopy-activity-and-covid-19-bsg-and-jag-guidance/">https://www.bsg.org.uk/covid-19-advice/endoscopy-activity-and-covid-19-bsg-and-jag-guidance/</a>                                                                                                                                                                                       |
| SIR         | Covid-19 Resources for IR<br><a href="https://www.sirweb.org/practice-resources/covid-19-resources/">https://www.sirweb.org/practice-resources/covid-19-resources/</a>                                                                                                                                                                                                                                                                                  |

Abbreviations: EASL- European Association for the study of the Liver; AASLD – American Association for the Study of Liver Disease; ILCA – International Liver Cancer Association; CASL – Canadian Association for Liver Disease; ESMO -European Society for Medical Oncology; ASCO – American Society for Clinical Oncology; NICE – National Institute for Health and Care Excellence; BSG – British Society of Gastroenterology; JAG – Joint Advisory Group on GI endoscopy; SIR – Society of Interventional Radiology
